# Supplementary material for: hsa-mir-30c promotes the invasive phenotype of metastatic breast cancer cells by targeting NOV/CCN3
Source: PubMed Central journal article supplement (PMC4129468; doi:10.1186/s12935-014-0073-0), 2014-08-02

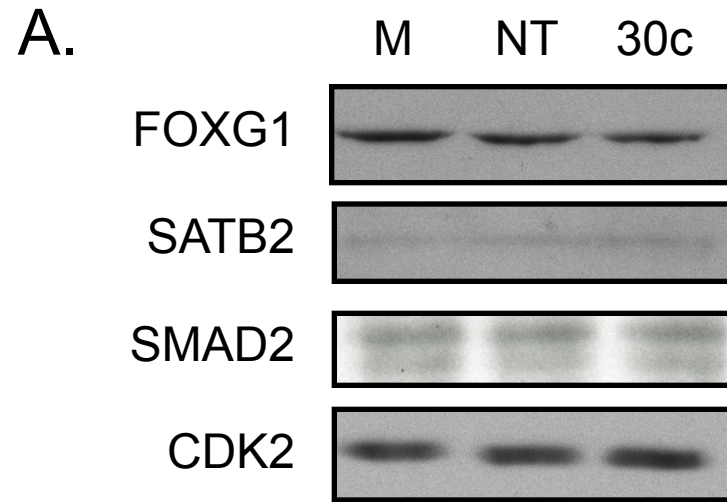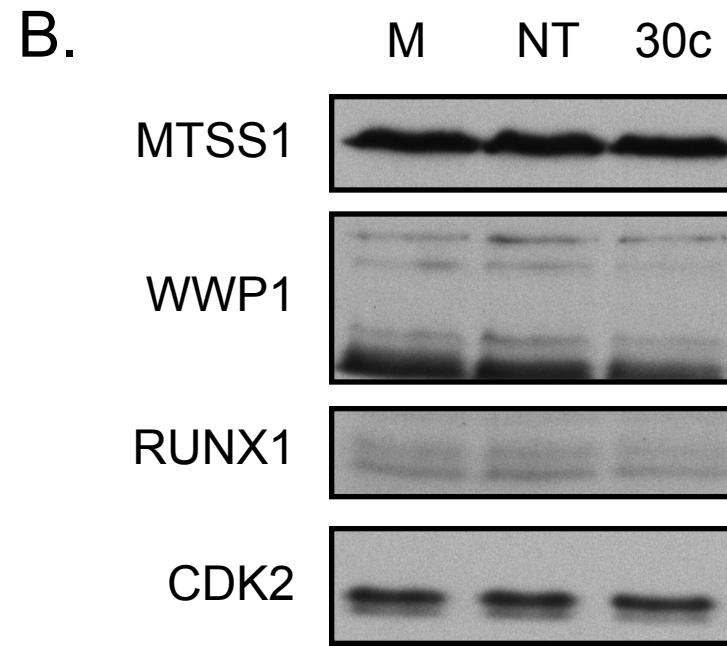

Supplement: s12935-014-0073-0-S1.pdf [file s12935-014-0073-0-S1.pdf]
