# Supplementary material for: hsa-mir-30c promotes the invasive phenotype of metastatic breast cancer cells by targeting NOV/CCN3
Source: PubMed Central journal article supplement (PMC4129468; doi:10.1186/s12935-014-0073-0), 2014-08-02
Supplement: s12935-014-0073-0-S2.pdf [file s12935-014-0073-0-S2.pdf]

A.

mirSVR Score: -1.0927

3' c g a c u c u c A C A U C C U A C A A A - U G u 5' hsa-mir-30c  
 ||||| ||||| ||  
 290: 5' a u u u a c u u U G U A G A C U G U U U C A C a 3' NOV

B.

mirSVR Score: -1.0446

3' g a A G G U C A - - G C U C C U A C A A A U G u 5' hsa-mir-30a  
 | |||| : || |||||  
 591: 5' u c U A C A G U A A U G A - A A U G U U U A C u 3' NOV

mirSVR Score: -1.0419

3' u c g a c U C A - C A U C C U A C A A A U G u 5' hsa-mir-30b  
 ||| | : |||||  
 591: 5' u c u a c A G U A A U G A A A U G U U U A C u 3' NOV

mirSVR Score: -1.0419

3' c g a c U C U C A - C A U C C U A C A A A U G u 5' hsa-mir-30c  
 | ||| | : |||||  
 590: 5' a u c u A C A G U A A U G A A A U G U U U A C a 3' NOV

mirSVR Score: -1.0446

3' g a A G G U C A - G C C C C U A C A A A U G u 5' hsa-mir-30d  
 | |||| | |||||  
 591: 5' u c U A C A G U A A U G A A A U G U U U A C u 3' NOV

mirSVR Score: -1.0392

3' g a A G G U C A G U U C - C U A C A A A U G u 5' hsa-mir-30e  
 | |||| | | |||||  
 591: 5' u c U A C A G U A A U G A A A U G U U U A C u 3' NOV

C.

mirSVR Score: -0.9748

3' g a a g g U C A G C U - - - C C U A C A A A U G u 5' hsa-mir-30a  
 ||| : || | |||||  
 1248: 5' a u a a a A G U U G A A C A U U G U U G U U U A C u 3' NOV

mirSVR Score: -0.9779

3' u c g a c u c a c a u c C U A C A A A U G u 5' hsa-mir-30b  
 | |||||  
 1252: 5' a a g u u g a a c a u u G U U G U U U A C u 3' NOV

mirSVR Score: -0.9779

3' c g a c u c u c a c a u c C U A C A A A U G u 5' hsa-mir-30c  
 | |||||  
 1251: 5' a a a g u u g a a c a u u G U U G U U U A C u 3' NOV

mirSVR Score: -0.9748

3' g a a g g u c a g c c c C U A C A A A U G u 5' hsa-mir-30d  
 | |||||  
 1252: 5' a a g u u g a a c a u u G U U G U U U A C a 3' NOV

mirSVR Score: -0.9748

3' g a a g g u c a G U U C C U A C A A A U G u 5' hsa-mir-30e  
 || || |||||  
 1252: 5' a a g u u g a a C A U U G U U G U U U A C u 3' NOV
